# Supplementary material for: Neutrophil-mediated oxidative stress and albumin structural damage predict COVID-19-associated mortality
Source: eLife. 2021 Nov 25;10:e69417. doi: 10.7554/eLife.69417 (PMC8641949; doi:10.7554/eLife.69417)
Supplement: Figure 2—source data 1. [file elife-69417-fig2-data1.xlsx]

## Sheet: Figure 2
	Panel B								Panel C				Panel D					Panel E
		Counts (% Total)							DCF-positive neutrophils (% Total)	Neutrophil count (% Total)			Neutrophil Counts (% Total)					DCF-positive neutrophils (% Total)
	Group	Lymph approx % Total	Neut tot % Total	Plts tot % Total	DCF pos tot Neut % Total	N-L-R			Neut tot % Total	DCF pos tot Neut % Total			Cont	Sev-Rec	Sev-Dec			Cont	Sev-Rec	Sev-Dec
	Cont	24.35	31.14	28.63	27.86	1.27885			31.14	27.86			31.14	40.3	76.15			27.86	39.9	74.87
	Cont	19.82	40.85	21.92	36.79	2.06105			40.85	36.79			40.85	41	63.2			36.79	42.46	68.5
	Cont	14.665	47.05	29.95	15.16	3.20832			47.05	15.16			47.05	73	73.48			15.16	75.7	89.2
	Cont	12.475	55.51	11.87	55.89	4.4497			55.51	55.89			55.51	78.3	79.2			55.89	49.57	73.91
	Cont	25.76	24.72	21.71	36.74	0.95963			24.72	36.74			24.72	40.86	77.64			36.74	53.1	68.94
	Cont	19.635	27.46	18.76	36.46	1.39852			27.46	36.46			27.46	42.66	82.13			36.46	35.74	73.91
	Cont	14.955	26.56	38.23	18.21	1.77599			26.56	18.21			26.56	74.86	72.87			18.21	72.74	68.94
	Cont	12.94	62.38	16.26	24.49	4.82071			62.38	24.49			62.38	84.96	85.04			24.49	69.18	85.65
	Cont	20.46	51.35	3.8	61.7	2.50978			51.35	61.7			51.35	75.85	68.68			61.7	76.65	76.79
	--	--	--	--	--	--			40.3	39.9				88.7	76.38				84.74
	Sev-Rec	12	74.86	6.8	72.74	6.23833			41	42.46					85.8
	Sev-Rec	9.015	42.66	4.8	35.74	4.73211			73	75.7
	Sev-Rec	5.4	84.96	20.84	69.18	15.7333			78.3	49.57
	Sev-Rec	7.38	78.3	14.56	49.57	10.6098			76.15	74.87
	Sev-Rec	6.7	73	5.9	75.7	10.8955			40.86	53.1
	Sev-Rec	20.77	41	12.28	42.46	1.974			42.66	35.74
	Sev-Rec	8.955	40.3	12.09	39.9	4.50028			63.2	68.5
	Sev-Rec	5.23	75.85	25.78	76.65	14.5029			74.86	72.74
	Sev-Rec	3.34	88.7	2.94	84.74	26.5569			73.48	89.2
	Sev-Rec	21.385	40.86	10.33	53.1	1.91069			79.2	73.91
	--	--	--	--	--	--			77.64	68.94
	Sev-Dec	6.31	76.38	23.62	76.79	12.1046			82.13	--
	Sev-Dec	--	68.68	9.9	85.65	--			84.96	69.18
	Sev-Dec	--	85.04	3.65	68.94	--			72.87	73.91
	Sev-Dec	--	72.87	13.47	73.91	--			85.04	68.94
	Sev-Dec	8.905	76.15	10.35	74.87	8.55138			68.68	85.65
	Sev-Dec	3.49	85.8	6.21	--	24.5845			76.38	76.79
	Sev-Dec	9.7	79.2	4	73.91	8.16495			75.85	76.65
	Sev-Dec	5.955	63.2	7.97	68.5	10.6129			88.7	84.74
	Sev-Dec	6.135	77.64	5.18	68.94	12.6553			85.8
	Sev-Dec	8.805	73.48	32.16	89.2	8.34526
	Sev-Dec	4.805	82.13	14.95	--	17.0926
