# Supplementary material for: Neutrophil-mediated oxidative stress and albumin structural damage predict COVID-19-associated mortality
Source: eLife. 2021 Nov 25;10:e69417. doi: 10.7554/eLife.69417 (PMC8641949; doi:10.7554/eLife.69417)
Supplement: Figure 3—source data 1. [file elife-69417-fig3-data1.xlsx]

## Sheet: Figure 3
	Panel A					Panel B						Panel C
													[H2O2] in plasma
	Time [min]	1A: O2 concentration [µM]				HPO	O2					Control	Sev-R	Sev-D
	0.03	199.949				uM	uM					2.2	8	13
	0.07	199.936				0	0					2	5	8
	0.1	199.914				0.2	0.098					2	7	8
	0.13	199.901				0.8	0.443					2.6	4.4	7.6
	0.17	199.892				1.2	0.537					2.8	7.2	6.4
	0.2	199.893				1.6	0.755					3.6	5.4	10
	0.23	199.876										2.8	4.6	9.4
	0.27	199.855										3	5.6	11.6
	0.3	199.839										4.5	5	11
	0.33	199.82										3.5	5.1	7
	0.37	199.804										3.5	7.5	10
	0.4	199.804											7.5	11
	0.43	199.78											10	11
	0.47	199.773											10.5	10
	0.5	199.768											10	8.5
	0.53	199.73											12.5	8.5
	0.57	199.708												15.5
	0.6	199.706												9
	0.63	199.697												8
	0.67	199.678												10
	0.7	199.645												10
	0.73	199.621												10
	0.77	199.617												9
	0.8	199.619
	0.83	199.594
	0.87	199.584
	0.9	199.583
	0.93	199.546
	0.97	199.539
	1	199.53
	1.03	199.508
	1.07	199.496
	1.1	199.493
	1.13	199.475
	1.17	199.454
	1.2	199.429
	1.23	199.424
	1.27	199.42
	1.3	199.407
	1.33	199.397
	1.37	199.387
	1.4	199.38
	1.43	199.38
	1.47	199.378
	1.5	199.354
	1.53	199.336
	1.57	199.323
	1.6	199.305
	1.63	199.281
	1.67	199.272
	1.7	199.25
	1.73	199.245
	1.77	199.249
	1.8	199.258
	1.83	199.246
	1.87	199.229
	1.9	199.216
	1.93	199.202
	1.97	199.192
	2	199.169
	2.03	199.149
	2.07	199.142
	2.1	199.137
	2.13	199.119
	2.17	199.104
	2.2	199.105
	2.23	199.085
	2.27	199.067
	2.3	199.063
	2.33	199.055
	2.37	199.054
	2.4	199.049
	2.43	199.054
	2.47	199.031
	2.5	199.015
	2.53	198.999
	2.57	198.997
	2.6	198.985
	2.63	198.97
	2.67	198.95
	2.7	198.966
	2.73	198.968
	2.77	198.951
	2.8	198.905
	2.83	198.919
	2.87	198.891
	2.9	198.894
	2.93	198.886
	2.97	198.873
	3	198.873
	3.03	198.876
	3.07	198.848
	3.1	198.84
	3.13	198.815
	3.17	198.802
	3.2	198.794
	3.23	198.79
	3.27	198.774
	3.3	198.751
	3.33	198.76
	3.37	198.784
	3.4	198.761
	3.43	198.714
	3.47	198.716
	3.5	198.727
	3.53	198.743
	3.57	198.746
	3.6	198.719
	3.63	198.698
	3.67	198.695
	3.7	198.681
	3.73	198.673
	3.77	198.665
	3.8	198.66
	3.83	198.645
	3.87	198.617
	3.9	198.6
	3.93	198.585
	3.97	198.581
	4	198.577
	4.03	198.568
	4.07	198.567
	4.1	198.561
	4.13	198.553
	4.17	198.545
	4.2	198.547
	4.23	198.531
	4.27	198.529
	4.3	198.544
	4.33	198.541
	4.37	198.515
	4.4	198.499
	4.43	198.479
	4.47	198.48
	4.5	198.47
	4.53	198.48
	4.57	198.487
	4.6	198.479
	4.63	198.47
	4.67	198.455
	4.7	198.445
	4.73	198.415
	4.77	198.402
	4.8	198.405
	4.83	198.405
	4.87	198.39
	4.9	198.386
	4.93	198.378
	4.97	198.357
	5	198.344
	5.03	198.339
	5.07	198.33
	5.1	198.332
	5.13	198.315
	5.17	198.303
	5.2	198.304
	5.23	198.314
	5.27	198.286
	5.3	198.271
	5.33	198.27
	5.37	198.274
	5.4	198.277
	5.43	198.263
	5.47	198.242
	5.5	198.234
	5.53	198.216
	5.57	198.217
	5.6	198.219
	5.63	198.21
	5.67	198.194
	5.7	198.182
	5.73	198.161
	5.77	198.143
	5.8	198.125
	5.83	198.116
	5.87	197.964
	5.9	197.933
	5.93	197.836
	5.97	196.503
	6	192.271
	6.03	185.189
	6.07	177.938
	6.1	170.412
	6.13	161.831
	6.17	152.431
	6.2	142.639
	6.23	132.549
	6.27	122.379
	6.3	113.218
	6.33	105.389
	6.37	98.325
	6.4	91.6027
	6.43	85.0389
	6.47	78.5436
	6.5	72.2699
	6.53	66.4556
	6.57	61.2646
	6.6	56.6788
	6.63	52.6678
	6.67	49.1387
	6.7	45.9761
	6.73	42.9505
	6.77	39.9573
	6.8	37.0407
	6.83	34.261
	6.87	31.6722
	6.9	29.2618
	6.93	27.0298
	6.97	25.0256
	7	23.2286
	7.03	21.528
	7.07	19.9454
	7.1	18.4574
	7.13	16.9882
	7.17	15.5326
	7.2	14.141
	7.23	12.8475
	7.27	11.6504
	7.3	10.5524
	7.33	9.549
	7.37	8.6293
	7.4	7.8015
	7.43	7.0548
	7.47	6.3675
	7.5	5.7397
	7.53	5.1659
	7.57	4.6597
	7.6	4.203
	7.63	3.7914
	7.67	3.4275
	7.7	3.1014
	7.73	2.8113
	7.77	2.5411
	7.8	2.27
	7.83	1.9872
	7.87	1.716
	7.9	1.4629
	7.93	1.2287
	7.97	1.0171
	8	0.827
	8.03	0.6505
	8.07	0.4865
	8.1	0.3343
	8.13	0.1875
	8.17	0.0406
	8.2	-0.0972
	8.23	-0.2305
	8.27	-0.3494
	8.3	-0.4665
	8.33	-0.5737
	8.37	-0.6646
	8.4	-0.7394
	8.43	-0.8097
	8.47	-0.8799
	8.5	-0.9583
	8.53	-1.0303
	8.57	-1.1024
	8.6	-1.1754
	8.63	-1.2474
	8.67	-1.3051
	8.7	-1.36
	8.73	-1.415
	8.77	-1.4663
	8.8	-1.5131
	8.83	-1.5591
	8.87	-1.6023
	8.9	-1.6366
	8.93	-1.6672
	8.97	-1.6942
	9	-1.7203
	9.03	-1.7437
	9.07	-1.7663
	9.1	-1.7888
	9.13	-1.8131
	9.17	-1.8365
	9.2	-1.8599
	9.23	-1.8825
	9.27	-1.9023
	9.3	-1.9248
	9.33	-1.9437
	9.37	-1.9617
	9.4	-1.977
	9.43	-1.9905
	9.47	-2.0005
	9.5	-2.0113
	9.53	-2.0239
	9.57	-2.0077
	9.6	-2.0851
	9.63	-1.796
	9.67	-1.2339
	9.7	-0.4593
	9.73	0.1974
	9.77	0.7639
	9.8	1.2738
	9.83	1.7503
	9.87	2.2114
	9.9	2.6591
	9.93	3.0978
	9.97	3.5383
	10	3.9706
	10.03	4.4021
	10.07	4.829
	10.1	5.256
	10.13	5.6865
	10.17	6.1126
	10.2	6.5486
	10.23	6.9836
	10.27	7.4718
	10.3	7.9123
	10.33	8.287
	10.37	8.6203
	10.4	8.9274
	10.43	9.2202
	10.47	9.5057
	10.5	9.7858
	10.53	10.0615
	10.57	10.3335
	10.6	10.6019
	10.63	11.0694
	10.67	12.0323
	10.7	12.126
	10.73	11.0793
	10.77	9.6291
	10.8	8.3014
	10.83	7.1449
	10.87	6.0198
	10.9	4.9479
	10.93	4.0021
	10.97	3.1077
	11	2.2583
	11.03	1.5476
	11.07	0.945
	11.1	0.4072
	11.13	-0.0512
	11.17	-0.4079
	11.2	-0.6827
	11.23	-0.9087
	11.27	-1.1033
	11.3	-1.279
	11.33	-1.4294
	11.37	-1.5555
	11.4	-1.6555
	11.43	-1.7383
	11.47	-1.8068
	11.5	-1.8662
	11.53	-1.9158
	11.57	-1.9644
	11.6	-2.0095
	11.63	-2.0545
	11.67	-2.0905
	11.7	-2.1311
	11.73	-2.1689
	11.77	-2.2067
	11.8	-2.2383
	11.83	-2.2671
	11.87	-2.2833
	11.9	-2.2977
	11.93	-2.3139
	11.97	-2.331
	12	-2.349
	12.03	-2.3671
	12.07	-2.377
	12.1	-2.3806
	12.13	-2.4049
	12.17	-2.2986
	12.2	-1.7275
	12.23	-1.0412
	12.27	-0.6115
	12.3	-0.3647
	12.33	-0.2413
	12.37	-0.1791
	12.4	-0.1485
	12.43	-0.1368
	12.47	-0.1323
	12.5	-0.1341
	12.53	-0.1431
	12.57	-0.1503
	12.6	-0.1566
	12.63	-0.1584
	12.67	-0.1611
	12.7	-0.1593
	12.73	-0.1584
	12.77	-0.1548
	12.8	-0.1539
	12.83	-0.1521
	12.87	-0.1512
	12.9	-0.1485
	12.93	-0.1485
	12.97	-0.144
	13	-0.1395
	13.03	-0.1332
	13.07	-0.1278
	13.1	-0.1224
	13.13	-0.117
	13.17	-0.1107
	13.2	-0.1053
	13.23	-0.1008
	13.27	-0.0963
	13.3	-0.0945
	13.33	-0.0873
	13.37	-0.0855
	13.4	-0.0819
	13.43	-0.0774
	13.47	-0.0756
	13.5	-0.071
	13.53	-0.0638
	13.57	-0.0602
	13.6	-0.0548
	13.63	-0.0494
	13.67	-0.044
	13.7	-0.0377
	13.73	-0.0287
	13.77	-0.0206
	13.8	-0.0125
	13.83	-0.0044
	13.87	0.0001
	13.9	0.0064
	13.93	0.0082
	13.97	0.0154
	14	0.019
	14.03	0.0235
	14.07	0.0298
	14.1	0.0343
	14.13	0.037
	14.17	0.0433
	14.2	0.0488
	14.23	0.0569
	14.27	0.0632
	14.3	0.0668
	14.33	0.0731
	14.37	0.0785
	14.4	0.0821
	14.43	0.0875
	14.47	0.092
	14.5	0.0965
	14.53	0.101
	14.57	0.1046
	14.6	0.1091
	14.63	0.1145
	14.67	0.1208
	14.7	0.1253
	14.73	0.1316
	14.77	0.1352
	14.8	0.1415
	14.83	0.146
	14.87	0.1514
	14.9	0.1541
	14.93	0.1595
	14.97	0.1631
	15	0.1686
	15.03	0.1713
	15.07	0.1785
	15.1	0.1839
	15.13	0.1866
	15.17	0.1902
	15.2	0.1956
	15.23	0.201
	15.27	0.2019
	15.3	0.2064
	15.33	0.21
	15.37	0.2136
	15.4	0.2172
	15.43	0.2217
	15.47	0.2253
	15.5	0.2271
	15.53	0.2334
	15.57	0.2388
	15.6	0.2406
	15.63	0.2451
	15.67	0.2496
	15.7	0.2505
	15.73	0.2541
	15.77	0.2595
	15.8	0.2613
	15.83	0.2658
	15.87	0.2712
	15.9	0.273
	15.93	0.2757
	15.97	0.2784
	16	0.2829
	16.03	0.2856
	16.07	0.2865
	16.1	0.292
	16.13	0.2974
	16.17	0.2992
	16.2	0.2992
	16.23	0.3037
	16.27	0.3082
	16.3	0.3109
	16.33	0.3118
	16.37	0.3145
	16.4	0.3163
	16.43	0.3199
	16.47	0.3217
	16.5	0.3235
	16.53	0.3262
	16.57	0.3307
	16.6	0.3325
	16.63	0.337
	16.67	0.3406
	16.7	0.3415
	16.73	0.3442
	16.77	0.3451
	16.8	0.3469
	16.83	0.3496
	16.87	0.3505
	16.9	0.3523
	16.93	0.3541
	16.97	0.3568
	17	0.3586
	17.03	0.3595
	17.07	0.3622
	17.1	0.3649
	17.13	0.3667
	17.17	0.3676
	17.2	0.3694
	17.23	0.3703
	17.27	0.373
	17.3	0.3748
	17.33	0.3757
	17.37	0.3775
	17.4	0.382
	17.43	0.3829
	17.47	0.3856
	17.5	0.3883
	17.53	0.3883
	17.57	0.5451
	17.6	3.5328
	17.63	7.4448
	17.67	8.4455
	17.7	7.8952
	17.73	6.9107
	17.77	5.9433
	17.8	5.1164
	17.83	4.4471
	17.87	3.9265
	17.9	3.5139
	17.93	3.1861
	17.97	2.9221
	18	2.7159
	18.03	2.5528
	18.07	2.4204
	18.1	2.3204
	18.13	2.2394
	18.17	2.1745
	18.2	2.1187
	18.23	2.07
	18.27	2.0358
	18.3	2.0034
	18.33	1.98
	18.37	1.9592
	18.4	1.943
	18.43	1.9322
	18.47	1.9196
	18.5	1.9124
	18.53	1.9052
	18.57	1.8989
	18.6	1.8899
	18.63	1.8827
	18.67	1.8773
	18.7	1.8728
	18.73	1.871
	18.77	1.8674
	18.8	1.8647
	18.83	1.862
	18.87	1.862
	18.9	1.8593
	18.93	1.8584
	18.97	1.8575
	19	1.8566
	19.03	1.8539
	19.07	1.8539
	19.1	1.853
	19.13	1.8511
	19.17	1.8502
	19.2	1.8502
	19.23	1.8493
	19.27	1.8475
	19.3	1.8457
	19.33	1.8475
	19.37	1.8457
	19.4	1.8466
	19.43	1.8484
	19.47	1.8466
	19.5	1.8457
	19.53	1.8439
	19.57	1.8457
	19.6	1.8457
	19.63	1.8466
	19.67	1.8439
	19.7	1.8448
	19.73	1.843
	19.77	1.8412
	19.8	1.8412
	19.83	1.8412
	19.87	1.8394
	19.9	1.8385
	19.93	1.8394
	19.97	1.8394
	20	1.8403
	20.03	1.8412
	20.07	1.8403
	20.1	1.8421
	20.13	1.8403
	20.17	1.8421
	20.2	1.8466
	20.23	1.8439
	20.27	1.843
	20.3	1.8457
	20.33	1.843
	20.37	1.8448
	20.4	1.8421
	20.43	1.8448
	20.47	1.8439
	20.5	1.8439
	20.53	1.8484
	20.57	1.8475
	20.6	1.8466
	20.63	1.8457
	20.67	1.8475
	20.7	1.8511
	20.73	1.8511
	20.77	1.8521
	20.8	1.8484
	20.83	1.871
	20.87	1.9421
	20.9	1.9818
	20.93	1.9854
	20.97	1.98
	21	1.9719
	21.03	1.9655
	21.07	1.9601
	21.1	1.9565
	21.13	1.9538
	21.17	1.9511
	21.2	1.9493
	21.23	1.9475
	21.27	1.9457
	21.3	1.9457
	21.33	1.9439
	21.37	1.9421
	21.4	1.9439
	21.43	1.9466
	21.47	1.9466
	21.5	1.9448
	21.53	1.9466
	21.57	1.9475
	21.6	1.9484
	21.63	1.9475
	21.67	1.9475
	21.7	1.9475
	21.73	1.9484
	21.77	1.9466
	21.8	1.9493
	21.83	1.9511
	21.87	1.9529
	21.9	2.1295
	21.93	2.7897
	21.97	3.1329
	22	3.1599
	22.03	3.0744
	22.07	2.9645
	22.1	2.8591
	22.13	2.7726
	22.17	2.7015
	22.2	2.6402
	22.23	2.5952
	22.27	2.5582
	22.3	2.5294
	22.33	2.5042
	22.37	2.4826
	22.4	2.4646
	22.43	2.4519
	22.47	2.4429
	22.5	2.433
	22.53	2.424
	22.57	2.4168
	22.6	2.4114
	22.63	2.4069
	22.67	2.4033
	22.7	2.3997
	22.73	2.3979
	22.77	2.3952
	22.8	2.3934
	22.83	2.3925
	22.87	2.3889
	22.9	2.388
	22.93	2.3862
	22.97	2.3871
	23	2.3835
	23.03	2.3826
	23.07	2.3862
	23.1	2.3898
	23.13	2.6231
	23.17	3.3239
	23.2	3.6202
	23.23	3.8607
	23.27	4.022
	23.3	3.967
	23.33	3.8292
	23.37	3.6824
	23.4	3.5509
	23.43	3.4392
	23.47	3.3482
	23.5	3.2734
	23.53	3.2113
	23.57	3.1617
	23.6	3.1185
	23.63	3.0861
	23.67	3.0636
	23.7	3.0437
	23.73	3.0266
	23.77	3.0113
	23.8	3.0014
	23.83	2.9915
	23.87	2.9807
	23.9	2.9762
	23.93	2.9717
	23.97	2.9681
	24	2.9645
	24.03	2.9591
	24.07	2.9564
	24.1	2.9555
	24.13	2.9537
	24.17	2.9537
	24.2	2.951
	24.23	2.9465
	24.27	2.9447
	24.3	2.9438
	24.33	2.9429
	24.37	2.9429
	24.4	2.9384
	24.43	2.9384
	24.47	2.9357
	24.5	2.9357
	24.53	2.9329
	24.57	2.932
	24.6	2.932
	24.63	2.9311
	24.67	2.9339
	24.7	2.9329
	24.73	2.9302
	24.77	2.9275
	24.8	2.9275
	24.83	2.9275
	24.87	2.9257
	24.9	2.9248
	24.93	2.9239
	24.97	2.9221
	25	2.9212
	25.03	2.9221
	25.07	2.923
	25.1	2.923
	25.13	2.9203
	25.17	2.9239
	25.2	2.9212
	25.23	2.9203
	25.27	2.9203
	25.3	2.9212
	25.33	2.9203
	25.37	2.9185
	25.4	2.9203
	25.43	2.9203
	25.47	2.9185
	25.5	2.9194
	25.53	2.9185
	25.57	2.9203
	25.6	2.9239
	25.63	2.9266
	25.67	2.9366
	25.7	3.0401
	25.73	4.2219
	25.77	5.0776
	25.8	5.347
	25.83	6.0531
	25.87	6.3234
	25.9	6.1297
	25.93	5.7892
	25.97	5.4388
	26	5.1245
	26.03	4.8633
	26.07	4.648
	26.1	4.4723
	26.13	4.3255
	26.17	4.2084
	26.2	4.1156
	26.23	4.0427
	26.27	3.9805
	26.3	3.931
	26.33	3.8904
	26.37	3.8571
	26.4	3.8265
	26.43	3.8031
	26.47	3.7842
	26.5	3.7688
	26.53	3.7562
	26.57	3.7445
	26.6	3.7346
	26.63	3.7229
	26.67	3.7139
	26.7	3.7112
	26.73	3.7085
	26.77	3.7058
	26.8	3.7049
	26.83	3.7031
	26.87	3.6995
	26.9	3.6977
	26.93	3.695
	26.97	3.6914
	27	3.6896
	27.03	3.6887
	27.07	3.6878
	27.1	3.6869
	27.13	3.6869
	27.17	3.6869
	27.2	3.686
	27.23	3.6851
	27.27	3.6869
	27.3	3.6851
	27.33	3.6869
	27.37	3.6842
	27.4	3.6833
	27.43	3.6824
	27.47	3.6824
	27.5	3.6806
	27.53	3.6815
	27.57	3.6815
	27.6	3.6824
	27.63	3.6815
	27.67	3.6806
	27.7	3.6797
	27.73	3.6815
	27.77	3.6824
	27.8	3.6824
	27.83	3.6824
	27.87	3.6815
	27.9	3.6797
	27.93	3.6833
	27.97	3.6806
	28	3.6797
	28.03	3.6806
	28.07	3.6788
	28.1	3.6806
	28.13	3.6788
	28.17	3.6779
	28.2	3.677
	28.23	3.6788
	28.27	3.6806
	28.3	3.6806
	28.33	3.6806
	28.37	3.6806
	28.4	3.6806
	28.43	3.6788
	28.47	3.6779
	28.5	3.6797
	28.53	3.6806
	28.57	3.6788
	28.6	3.6815
	28.63	3.6815
	28.67	3.6815
	28.7	3.6806
	28.73	3.6815
	28.77	3.6815
	28.8	3.6824
	28.83	3.6842
	28.87	3.6833
	28.9	3.6806
	28.93	3.677
	28.97	3.6743
	29	3.6734
	29.03	3.6743
	29.07	3.6752
	29.1	3.6752
	29.13	3.6761
	29.17	3.6752
	29.2	3.6761
	29.23	4.0166
	29.27	6.6485
	29.3	8.7158
	29.33	9.1733
	29.37	8.9004
	29.4	8.3969
	29.43	7.8582
	29.47	7.3673
	29.5	6.9404
	29.53	6.5819
	29.57	6.2765
	29.6	6.0234
	29.63	5.8153
	29.67	5.6397
	29.7	5.4938
	29.73	5.374
	29.77	5.2731
	29.8	5.1866
	29.83	5.1164
	29.87	5.0542
	29.9	5.0065
	29.93	4.9641
	29.97	4.9308
	30	4.9011
	30.03	4.875
	30.07	4.8542
	30.1	4.8362
	30.13	4.8209
	30.17	4.8074
	30.2	4.7966
	30.23	4.7858
	30.27	4.7759
	30.3	4.7705
	30.33	4.7597
	30.37	4.7498
	30.4	4.748
	30.43	4.748
	30.47	4.7453
	30.5	4.7435
	30.53	4.739
	30.57	4.7362
	30.6	4.7326
	30.63	4.7308
	30.67	4.729
	30.7	4.7263
	30.73	4.7227
	30.77	4.7191
	30.8	4.7191
	30.83	4.7164
	30.87	4.7146
	30.9	4.7164
	30.93	4.7173
	30.97	4.7173
	31	4.7182
	31.03	4.7146
	31.07	4.7146
	31.1	4.7164
	31.13	4.7164
	31.17	4.7164
	31.2	4.7155
	31.23	4.7155
	31.27	4.7155
	31.3	4.7155
	31.33	4.7137
	31.37	4.7137
	31.4	4.7119
	31.43	4.711
	31.47	4.7128
	31.5	4.7128
	31.53	4.7146
	31.57	4.7137
	31.6	4.7146
	31.63	4.7146
	31.67	4.7155
	31.7	4.7155
	31.73	4.7128
	31.77	4.7146
	31.8	4.7164
	31.83	4.7155
	31.87	4.7155
	31.9	4.7164
	31.93	4.7182
	31.97	4.7182
	32	4.7182
	32.03	4.7173
	32.07	4.7191
	32.1	4.7164
	32.13	4.7155
	32.17	4.7182
	32.2	4.7191
	32.23	4.7182
	32.27	5.0209
	32.3	7.4574
	32.33	9.4445
	32.37	9.912
	32.4	9.6994
	32.43	9.2724
	32.47	8.8148
	32.5	8.3915
	32.53	8.0159
	32.57	7.6862
	32.6	7.4034
	32.63	7.1602
	32.67	6.9521
	32.7	6.7728
	32.73	6.6233
	32.77	6.4954
	32.8	6.3855
	32.83	6.2945
	32.87	6.2153
	32.9	6.145
	32.93	6.0865
	32.97	6.0387
	33	5.9982
	33.03	5.9604
	33.07	5.9288
	33.1	5.9036
	33.13	5.8838
	33.17	5.8658
	33.2	5.8478
	33.23	5.8307
	33.27	5.8199
	33.3	5.8063
	33.33	5.7946
	33.37	5.7838
	33.4	5.7766
	33.43	5.7721
	33.47	5.7676
	33.5	5.7604
	33.53	5.7577
	33.57	5.7532
	33.6	5.7496
	33.63	5.7496
	33.67	5.7469
	33.7	5.7442
	33.73	5.7415
	33.77	5.7388
	33.8	5.737
	33.83	5.7361
	33.87	5.7361
	33.9	5.7325
	33.93	5.7325
	33.97	5.7307
	34	5.728
	34.03	5.728
	34.07	5.7271
	34.1	5.7271
	34.13	5.7262
	34.17	5.7235
	34.2	5.7235
	34.23	5.7253
	34.27	5.7262
	34.3	5.7253
	34.33	5.7217
	34.37	5.7217
	34.4	5.7208
	34.43	5.7208
	34.47	5.719
	34.5	5.7199
	34.53	5.719
	34.57	5.7199
	34.6	5.719
	34.63	5.7181
	34.67	5.7154
	34.7	5.7136
	34.73	5.7154
	34.77	5.7163
	34.8	5.7172
	34.83	5.7163
	34.87	5.7172
	34.9	5.7145
	34.93	5.7127
	34.97	5.7154
	35	5.7136
	35.03	5.7163
	35.07	5.7136
	35.1	5.7154
	35.13	5.7145
	35.17	5.7172
	35.2	5.7172
	35.23	5.719
	35.27	5.7208
	35.3	6.6152
	35.33	9.1715
	35.37	10.4857
	35.4	10.6686
	35.43	10.4038
	35.47	10.0128
	35.5	9.612
	35.53	9.2409
	35.57	8.9112
	35.6	8.623
	35.63	8.3699
	35.67	8.1501
	35.7	7.96
	35.73	7.7943
	35.77	7.652
	35.8	7.5313
	35.83	7.425
	35.87	7.334
	35.9	7.2529
	35.93	7.1809
	35.97	7.1205
	36	7.0701
	36.03	7.0251
	36.07	6.9854
	36.1	6.9503
	36.13	6.9224
	36.17	6.8962
	36.2	6.8755
	36.23	6.8566
	36.27	6.8386
	36.3	6.8242
	36.33	6.8107
	36.37	6.7999
	36.4	6.79
	36.43	6.7809
	36.47	6.7719
	36.5	6.7665
	36.53	6.7593
	36.57	6.7539
	36.6	6.7503
	36.63	6.7467
	36.67	6.7449
	36.7	6.7404
	36.73	6.7404
	36.77	6.7359
	36.8	6.7341
	36.83	6.7332
	36.87	6.7305
	36.9	6.7305
	36.93	6.7287
	36.97	6.7242
	37	6.7206
	37.03	6.7206
	37.07	6.7188
	37.1	6.7179
	37.13	6.7197
	37.17	6.7188
	37.2	6.717
	37.23	6.7161
	37.27	6.7152
	37.3	6.7152
	37.33	6.717
	37.37	6.7143
	37.4	6.7143
	37.43	6.7125
	37.47	6.7125
	37.5	6.7134
	37.53	6.7125
	37.57	6.7116
	37.6	6.7107
	37.63	6.7107
	37.67	6.7098
	37.7	6.7098
	37.73	6.7089
	37.77	6.7098
	37.8	6.7089
	37.83	6.7071
	37.87	6.7089
	37.9	6.7098
	37.93	6.708
	37.97	6.7071
	38	6.7062
	38.03	6.7071
	38.07	6.7053
	38.1	6.708
	38.13	6.7071
	38.17	6.7062
	38.2	6.7071
	38.23	6.7053
	38.27	7.1836
	38.3	10.5371
	38.33	13.1438
	38.37	13.8392
	38.4	13.6681
	38.43	13.2042
	38.47	12.6682
	38.5	12.1467
	38.53	11.6747
	38.57	11.2559
	38.6	10.8839
	38.63	10.5569
	38.67	10.2677
	38.7	10.0092
	38.73	9.7813
	38.77	9.5796
	38.8	9.4012
	38.83	9.2445
	38.87	9.1103
	38.9	8.9914
	38.93	8.8878
	38.97	8.7959
	39	8.7149
	39.03	8.6446
	39.07	8.5815
	39.1	8.5293
	39.13	8.4807
	39.17	8.4365
	39.2	8.3987
	39.23	8.3681
	39.27	8.3374
	39.3	8.3104
	39.33	8.2888
	39.37	8.269
	39.4	8.2528
	39.43	8.2384
	39.47	8.2221
	39.5	8.2122
	39.53	8.2005
	39.57	8.1906
	39.6	8.1816
	39.63	8.1753
	39.67	8.1699
	39.7	8.1609
	39.73	8.1591
	39.77	8.1546
	39.8	8.151
	39.83	8.1465
	39.87	8.1438
	39.9	8.1384
	39.93	8.1366
	39.97	8.133
	40	8.1339
	40.03	8.1321
	40.07	8.1294
	40.1	8.1276
	40.13	8.1231
	40.17	8.1231
	40.2	8.1204
	40.23	8.1186
	40.27	8.1177
	40.3	8.115
	40.33	8.1123
	40.37	8.1132
	40.4	8.1141
	40.43	8.1132
	40.47	8.1132
	40.5	8.1114
	40.53	8.1132
	40.57	8.1123
	40.6	8.1123
	40.63	8.1132
	40.67	8.115
	40.7	8.1123
	40.73	8.1105
	40.77	8.1105
	40.8	8.1132
	40.83	8.1114
	40.87	8.1105
	40.9	8.1105
	40.93	8.1069
	40.97	8.1078
	41	8.1069
	41.03	8.1051
	41.07	8.106
	41.1	8.106
	41.13	8.106
	41.17	8.106
	41.2	8.1069
	41.23	8.1069
	41.27	8.1069
	41.3	8.1041
	41.33	8.1069
	41.37	8.1483
	41.4	8.4365
	41.43	11.6018
	41.47	14.2022
	41.5	15.0057
	41.53	14.9462
	41.57	14.5751
	41.6	14.1148
	41.63	13.6528
	41.67	13.2204
	41.7	12.8187
	41.73	12.4521
	41.77	12.1242
	41.8	11.8314
	41.83	11.5711
	41.87	11.3414
	41.9	11.137
	41.93	10.9532
	41.97	10.7857
	42	10.6398
	42.03	10.5073
	42.07	10.3894
	42.1	10.2822
	42.13	10.1921
	42.17	10.1092
	42.2	10.0327
	42.23	9.9696
	42.27	9.9102
	42.3	9.8579
	42.33	9.8111
	42.37	9.7687
	42.4	9.7309
	42.43	9.7003
	42.47	9.6697
	42.5	9.6444
	42.53	9.621
	42.57	9.6012
	42.6	9.5814
	42.63	9.5661
	42.67	9.5499
	42.7	9.5354
	42.73	9.5246
	42.77	9.5138
	42.8	9.5057
	42.83	9.4994
	42.87	9.4895
	42.9	9.4805
	42.93	9.476
	42.97	9.4706
	43	9.467
	43.03	9.4616
	43.07	9.4544
	43.1	9.4508
	43.13	9.4481
	43.17	9.4481
	43.2	9.4445
	43.23	9.4418
	43.27	9.4391
	43.3	9.4364
	43.33	9.4346
	43.37	9.431
	43.4	9.4283
	43.43	9.4255
	43.47	9.4264
	43.5	9.4246
	43.53	9.4237
	43.57	9.4237
	43.6	9.4201
	43.63	9.4219
	43.67	9.421
	43.7	9.4201
	43.73	9.421
	43.77	9.421
	43.8	9.4219
	43.83	9.4201
	43.87	9.4201
	43.9	9.4201
	43.93	9.4183
	43.97	9.4192
	44	9.4192
	44.03	9.4192
	44.07	9.4183
	44.1	9.4174
	44.13	9.4165
	44.17	9.4156
	44.2	9.4174
	44.23	9.4156
	44.27	9.4156
	44.3	9.4156
	44.33	9.4156
	44.37	9.4156
	44.4	9.4147
	44.43	9.4156
	44.47	9.412
	44.5	9.412
	44.53	9.4093
	44.57	9.4084
	44.6	9.4111
	44.63	9.4102
	44.67	9.4075
	44.7	9.4102
	44.73	9.4138
	44.77	9.4156
	44.8	9.6697
	44.83	13.3141
	44.87	17.2657
	44.9	18.7213
	44.93	18.8384
	44.97	18.4538
	45	17.9079
	45.03	17.3377
	45.07	16.7919
	45.1	16.2802
	45.13	15.8101
	45.17	15.3768
	45.2	14.985
	45.23	14.631
	45.27	14.3103
	45.3	14.0185
	45.33	13.7573
	45.37	13.5222
	45.4	13.3114
	45.43	13.1231
	45.47	12.9556
	45.5	12.8016
	45.53	12.6601
	45.57	12.534
	45.6	12.4178
	45.63	12.3152
	45.67	12.2224
	45.7	12.1413
	45.73	12.0683
	45.77	11.9999
	45.8	11.9413
	45.83	11.8864
	45.87	11.8342
	45.9	11.7909
	45.93	11.7468
	45.97	11.7071
	46	11.6729
	46.03	11.6432
	46.07	11.6171
	46.1	11.5937
	46.13	11.572
	46.17	11.5495
	46.2	11.5306
	46.23	11.5144
	46.27	11.5
	46.3	11.4856
	46.33	11.473
	46.37	11.4603
	46.4	11.4495
	46.43	11.4405
	46.47	11.4306
	46.5	11.4207
	46.53	11.4135
	46.57	11.4072
	46.6	11.4
	46.63	11.3946
	46.67	11.391
	46.7	11.3856
	46.73	11.3802
	46.77	11.3748
	46.8	11.3694
	46.83	11.3667
	46.87	11.3658
	46.9	11.3631
	46.93	11.3604
	46.97	11.3586
	47	11.3532
	47.03	11.3514
	47.07	11.3504
	47.1	11.3495
	47.13	11.3468
	47.17	11.3441
	47.2	11.3405
	47.23	11.3396
	47.27	11.3378
	47.3	11.3387
	47.33	11.3378
	47.37	11.3342
	47.4	11.3324
	47.43	11.3306
	47.47	11.3324
	47.5	11.3315
	47.53	11.3279
	47.57	11.3306
	47.6	11.3261
	47.63	11.3243
	47.67	11.3234
	47.7	11.3216
	47.73	11.3207
	47.77	11.3198
	47.8	11.3198
	47.83	11.3216
	47.87	11.3225
	47.9	11.3234
	47.93	11.3243
	47.97	11.3243
	48	11.3234
	48.03	11.3225
	48.07	11.3216
	48.1	11.3216
	48.13	11.3216
	48.17	11.3189
	48.2	11.318
	48.23	11.3162
	48.27	11.3171
	48.3	11.3189
	48.33	11.318
	48.37	11.3198
	48.4	11.3198
	48.43	11.3189
	48.47	11.3189
	48.5	11.3162
	48.53	11.5063
	48.57	13.9599
	48.6	16.6595
	48.63	17.6791
	48.67	17.7944
	48.7	17.5638
	48.73	17.2242
	48.77	16.8621
	48.8	16.5117
	48.83	16.1803
	48.87	15.8704
	48.9	15.584
	48.93	15.3228
	48.97	15.0832
	49	14.8661
	49.03	14.6706
	49.07	14.4896
	49.1	14.3256
	49.13	14.1788
	49.17	14.0455
	49.2	13.9239
	49.23	13.8113
	49.27	13.7104
	49.3	13.6167
	49.33	13.5339
	49.37	13.4573
	49.4	13.3888
	49.43	13.3285
	49.47	13.2717
	49.5	13.2195
	49.53	13.1745
	49.57	13.133
	49.6	13.0925
	49.63	13.0574
	49.67	13.0249
	49.7	12.997
	49.73	12.9709
	49.77	12.9475
	49.8	12.925
	49.83	12.906
	49.87	12.8853
	49.9	12.87
	49.93	12.8538
	49.97	12.8412
	50	12.8286
	50.03	12.8178
	50.07	12.807
	50.1	12.7971
	50.13	12.7898
	50.17	12.7826
	50.2	12.7754
	50.23	12.7664
	50.27	12.7619
	50.3	12.7556
	50.33	12.7502
	50.37	12.743
	50.4	12.7358
	50.43	12.7313
	50.47	12.7313
	50.5	12.7268
	50.53	12.7223
	50.57	12.7205
	50.6	12.7187
	50.63	12.7169
	50.67	12.7133
	50.7	12.7115
	50.73	12.7097
	50.77	12.7052
	50.8	12.7043
	50.83	12.7025
	50.87	12.6998
	50.9	12.6971
	50.93	12.6962
	50.97	12.6953
	51	12.6944
	51.03	12.6926
	51.07	12.6917
	51.1	12.6908
	51.13	12.6872
	51.17	12.6872
	51.2	12.6872
	51.23	12.6881
	51.27	12.6863
	51.3	12.6899
	51.33	12.6881
	51.37	12.6881
	51.4	12.6881
	51.43	12.6863
	51.47	12.6827
	51.5	12.6827
	51.53	12.6791
	51.57	12.6736
	51.6	12.6755
	51.63	12.6709
	51.67	12.6691
	51.7	12.6691
	51.73	12.6691
	51.77	12.6718
	51.8	12.6746
	51.83	12.6791
	51.87	12.6818
	51.9	12.6827
	51.93	12.6818
	51.97	12.6818
	52	12.6791
	52.03	12.6845
	52.07	12.7808
	52.1	15.3435
	52.13	18.8231
	52.17	20.3084
	52.2	20.5939
	52.23	20.4021
	52.27	20.0454
	52.3	19.6427
	52.33	19.2464
	52.37	18.8717
	52.4	18.5258
	52.43	18.2088
	52.47	17.9178
	52.5	17.6485
	52.53	17.399
	52.57	17.1738
	52.6	16.9675
	52.63	16.782
	52.67	16.6117
	52.7	16.4523
	52.73	16.31
	52.77	16.1803
	52.8	16.0623
	52.83	15.9542
	52.87	15.856
	52.9	15.7659
	52.93	15.6867
	52.97	15.6146
	53	15.5497
	53.03	15.4912
	53.07	15.4344
	53.1	15.3849
	53.13	15.3399
	53.17	15.3047
	53.2	15.2705
	53.23	15.2381
	53.27	15.2057
	53.3	15.1768
	53.33	15.1516
	53.37	15.1336
	53.4	15.1147
	53.43	15.0985
	53.47	15.0805
	53.5	15.0669
	53.53	15.0525
	53.57	15.0408
	53.6	15.03
	53.63	15.0219
	53.67	15.0138
	53.7	15.0075
	53.73	15.0012
	53.77	14.994
	53.8	14.9886
	53.83	14.985
	53.87	14.9832
	53.9	14.9787
	53.93	14.9787
	53.97	14.9733
	54	14.9724
	54.03	14.9733
	54.07	14.9724
	54.1	14.9715
	54.13	14.9733
	54.17	14.9733
	54.2	14.9742
	54.23	14.9706
	54.27	14.9715
	54.3	14.9715
	54.33	14.9724
	54.37	14.9706
	54.4	14.9706
	54.43	14.9706
	54.47	14.9715
	54.5	14.9706
	54.53	14.9724
	54.57	14.9715
	54.6	14.9715
	54.63	14.9742
	54.67	14.9769
	54.7	14.9787
	54.73	14.9787
	54.77	14.9814
	54.8	14.9832
	54.83	14.9841
	54.87	14.9859
	54.9	14.9859
	54.93	14.9868
	54.97	14.9886
	55	14.9886
	55.03	14.9877
	55.07	14.9922
	55.1	14.9922
	55.13	14.9904
	55.17	14.994
	55.2	14.9949
	55.23	14.9895
	55.27	15.3525
	55.3	18.2664
	55.33	21.1425
	55.37	22.3297
	55.4	22.6089
	55.43	22.5062
	55.47	22.2594
	55.5	21.964
	55.53	21.655
	55.57	21.3479
	55.6	21.056
	55.63	20.7813
	55.67	20.5237
	55.7	20.2859
	55.73	20.0634
	55.77	19.8526
	55.8	19.6572
	55.83	19.4806
	55.87	19.3212
	55.9	19.1717
	55.93	19.0275
	55.97	18.8996
	56	18.7825
	56.03	18.6726
	56.07	18.57
	56.1	18.4754
	56.13	18.3889
	56.17	18.3078
	56.2	18.2349
	56.23	18.1673
	56.27	18.1097
	56.3	18.0538
	56.33	18.0016
	56.37	17.9529
	56.4	17.9088
	56.43	17.871
	56.47	17.834
	56.5	17.798
	56.53	17.7683
	56.57	17.7368
	56.6	17.7097
	56.63	17.6836
	56.67	17.6593
	56.7	17.6359
	56.73	17.6179
	56.77	17.5962
	56.8	17.5809
	56.83	17.5656
	56.87	17.5539
	56.9	17.5422
	56.93	17.5296
	56.97	17.5161
	57	17.5035
	57.03	17.4918
	57.07	17.4809
	57.1	17.4755
	57.13	17.4656
	57.17	17.4575
	57.2	17.4503
	57.23	17.4458
	57.27	17.4386
	57.3	17.4341
	57.33	17.426
	57.37	17.4206
	57.4	17.4152
	57.43	17.4116
	57.47	17.408
	57.5	17.4026
	57.53	17.3981
	57.57	17.3972
	57.6	17.3981
	57.63	17.3936
	57.67	17.3891
	57.7	17.3873
	57.73	17.3846
	57.77	17.3846
	57.8	17.381
	57.83	17.3783
	57.87	17.3756
	57.9	17.3738
	57.93	17.3711
	57.97	17.3666
	58	17.3657
	58.03	17.3629
	58.07	17.362
	58.1	17.3629
	58.13	17.362
	58.17	17.3575
	58.2	17.3548
	58.23	17.3566
	58.27	17.3557
	58.3	17.3548
	58.33	17.3566
	58.37	17.3566
	58.4	17.353
	58.43	17.3494
	58.47	17.3476
	58.5	17.3485
	58.53	17.3449
	58.57	17.344
	58.6	17.3449
	58.63	17.3449
	58.67	17.3458
	58.7	17.3449
	58.73	17.344
	58.77	17.3449
	58.8	17.3431
	58.83	17.3449
	58.87	17.3404
	58.9	17.3413
	58.93	17.3386
	58.97	17.3359
	59	17.3377
	59.03	17.3368
	59.07	17.3404
	59.1	17.3386
	59.13	17.5512
	59.17	20.5642
	59.2	23.897
	59.23	25.3003
	59.27	25.6327
	59.3	25.5318
	59.33	25.2751
	59.37	24.9662
	59.4	24.6464
	59.43	24.3293
	59.47	24.0276
	59.5	23.7412
	59.53	23.4718
	59.57	23.2187
	59.6	22.9845
	59.63	22.7674
	59.67	22.563
	59.7	22.3747
	59.73	22.1982
	59.77	22.0333
	59.8	21.882
	59.83	21.7415
	59.87	21.6073
	59.9	21.4848
	59.93	21.3722
	59.97	21.2677
	60	21.1713
	60.03	21.0794
	60.07	20.9939
	60.1	20.9173
	60.13	20.8443
	60.17	20.775
	60.2	20.7137
	60.23	20.6525
	60.27	20.5948
	60.3	20.5444
	60.33	20.494
	60.37	20.4471
	60.4	20.4075
	60.43	20.3687
	60.47	20.3381
	60.5	20.3048
	60.53	20.2751
	60.57	20.248
	60.6	20.221
	60.63	20.1967
	60.67	20.1715
	60.7	20.1454
	60.73	20.1246
	60.77	20.1048
	60.8	20.0877
	60.83	20.0733
	60.87	20.0625
	60.9	20.0454
	60.93	20.0283
	60.97	20.013
	61	20.0003
	61.03	19.9868
	61.07	19.9769
	61.1	19.9661
	61.13	19.9535
	61.17	19.9454
	61.2	19.9391
	61.23	19.9319
	61.27	19.9238
	61.3	19.9121
	61.33	19.9067
	61.37	19.9013
	61.4	19.8932
	61.43	19.8877
	61.47	19.8814
	61.5	19.8778
	61.53	19.8742
	61.57	19.8697
	61.6	19.8652
	61.63	19.8598
	61.67	19.8571
	61.7	19.8508
	61.73	19.849
	61.77	19.8463
	61.8	19.8418
	61.83	19.8364
	61.87	19.8337
	61.9	19.8301
	61.93	19.8292
	61.97	19.8265
	62	19.8247
	62.03	19.8184
	62.07	19.8157
	62.1	19.813
	62.13	19.8103
	62.17	19.8094
	62.2	19.8112
	62.23	19.8103
	62.27	19.8058
	62.3	19.8058
	62.33	19.8022
	62.37	19.8004
	62.4	19.7968
	62.43	19.7941
	62.47	19.7923
	62.5	19.7914
	62.53	19.7914
	62.57	19.7878
	62.6	19.7869
	62.63	19.7878
	62.67	19.786
	62.7	19.7815
	62.73	19.7797
	62.77	19.7761
	62.8	19.7716
	62.83	19.7707
	62.87	21.065
	62.9	24.8401
	62.93	27.1631
	62.97	27.9918
	63	28.1458
	63.03	28.0314
	63.07	27.8188
	63.1	27.5756
	63.13	27.318
	63.17	27.0586
	63.2	26.8154
	63.23	26.5812
	63.27	26.3614
	63.3	26.148
	63.33	25.9462
	63.37	25.7579
	63.4	25.576
	63.43	25.4057
	63.47	25.2445
	63.5	25.0977
	63.53	24.9581
	63.57	24.823
	63.6	24.6986
	63.63	24.5807
	63.67	24.469
	63.7	24.3627
	63.73	24.269
	63.77	24.1789
	63.8	24.0933
	63.83	24.0105
	63.87	23.9294
	63.9	23.8592
	63.93	23.7943
	63.97	23.7294
	64	23.6691
	64.03	23.6114
	64.07	23.5565
	64.1	23.5061
	64.13	23.4583
	64.17	23.416
	64.2	23.3763
	64.23	23.3385
	64.27	23.3016
	64.3	23.2674
	64.33	23.2304
	64.37	23.1989
	64.4	23.1701
	64.43	23.1404
	64.47	23.1142
	64.5	23.089
	64.53	23.0656
	64.57	23.0422
	64.6	23.0197
	64.63	23.0007
	64.67	22.9827
	64.7	22.9656
	64.73	22.9476
	64.77	22.9296
	64.8	22.9125
	64.83	22.899
	64.87	22.8827
	64.9	22.8665
	64.93	22.8548
	64.97	22.8449
	65	22.8332
	65.03	22.8206
	65.07	22.8107
	65.1	22.7972
	65.13	22.7864
	65.17	22.7783
	65.2	22.7719
	65.23	22.7629
	65.27	22.753
	65.3	22.744
	65.33	22.735
	65.37	22.7269
	65.4	22.717
	65.43	22.7098
	65.47	22.7035
	65.5	22.6972
	65.53	22.6909
	65.57	22.6864
	65.6	22.6783
	65.63	22.6711
	65.67	22.6684
	65.7	22.6666
	65.73	22.6603
	65.77	22.6548
	65.8	22.6521
	65.83	22.644
	65.87	22.6413
	65.9	22.6359
	65.93	22.6305
	65.97	22.6224
	66	22.6188
	66.03	22.6116
	66.07	22.6107
	66.1	22.6062
	66.13	22.6053
	66.17	22.6053
	66.2	22.5999
	66.23	22.5954
	66.27	22.5909
	66.3	22.5855
	66.33	22.5792
	66.37	22.5774
	66.4	22.5756
	66.43	22.5747
	66.47	22.5747
	66.5	22.5702
	66.53	22.5666
	66.57	22.5648
[truncated: 1,801 more rows]
