# Supplementary material for: Neutrophil-mediated oxidative stress and albumin structural damage predict COVID-19-associated mortality
Source: eLife. 2021 Nov 25;10:e69417. doi: 10.7554/eLife.69417 (PMC8641949; doi:10.7554/eLife.69417)
Supplement: Figure 4—source data 1. [file elife-69417-fig4-data1.xlsx]

## Sheet: Fig 4
		Panel A					Panel D									Panel D										Panel E					Panel E						Panel F					Panel F						Panel I
		[Albumin], g/L					Plasma	Plasma	Plasma	Plasma	Plasma	Plasma	Plasma			Whole Blood	Whole Blood	Whole Blood	Whole Blood	Whole Blood	Whole Blood	Whole Blood				Plasma	Plasma	Plasma			Whole Blood	Whole Blood	Whole Blood				Plasma	Plasma	Plasma			Whole Blood	Whole Blood	Whole Blood				Timestamp	Control
		Control	Sev-R	Sev-D			S parameter in plasma	S parameter in plasma	S parameter in plasma	S parameter in plasma	S parameter in plasma	S parameter in plasma	S parameter in plasma			S parameter in plasma	S parameter in plasma	S parameter in plasma	S parameter in plasma	S parameter in plasma	S parameter in plasma	S parameter in plasma				Tau	Tau	Tau			Tau	Tau	Tau				S/W	S/W	S/W			S/W	S/W	S/W					Statistics On Rows of [Signal decay of all groups by ascorbate both 5- and 16-DSA]16DSA!Col("C8-16DSA"):Col("C23-16DSA")
		46.4198	22.716	38			16-DSA	16-DSA	16-DSA		5-DSA	5-DSA	5-DSA			16-DSA	16-DSA	16-DSA		5-DSA	5-DSA	5-DSA				16-DSA	16-DSA	16-DSA			16-DSA	16-DSA	16-DSA				16-DSA	16-DSA	16-DSA			16-DSA	16-DSA	16-DSA				0	100
		22.5926	20.1235	16.4198			Control	Sev-R	Sev-D		Control	Sev-R	Sev-D			Control	Sev-R	Sev-D		Control	Sev-R	Sev-D				Control	Sev-R	Sev-D			Control	Sev-R	Sev-D				Control	Sev-R	Sev-D			Control	Sev-R	Sev-D				69.197	88.4779
		38.5185	20.3704	23.8272			0.68036	0.66061	0.59466		0.76374	0.73437	0.73747			0.63849	0.59426	0.61359		0.76622	0.72985	0.71613				1.86126e-09	8.24615e-10	9.70387e-10			6.89341e-10	2.80797e-10	1.99846e-10				0.38371	0.26316	0.35473			0.25458	0.17187	0.13402				138.513	79.4277
		48.0247	51.4815	37.5309			0.70201	0.62879	0.62018		0.7713	0.75214	0.70301			0.61944	0.62743	0.6125		0.74239	0.74766	0.70963				1.07876e-09	1.02888e-09	3.07695e-10			5.45613e-10	4.5209e-10	2.20969e-10				0.37828	0.27356	0.2689			0.26814	0.20306	0.15499				207.994	72.7521
		48.642	31.4815	20.4938			0.69617	0.68736	0.58685		0.76416	0.72284	0.74463			0.63553	0.60987	0.58391		0.75506	0.74415	0.70643				1.48291e-09	9.58785e-10	1.07215e-09			9.58165e-10	6.04118e-10	2.67449e-10				0.37624	0.33036	0.2895			0.28136	0.24904	0.13055				277.388	67.2381
		54.321	39.7531	23.2099			0.70251	0.5918	0.60806		0.75763	0.72991	0.71079			0.64825	0.61122	0.60071		0.77618	0.74596	0.71014				2.2535e-09	7.51851e-10	4.60207e-10			7.5192e-10	5.71671e-10	1.57012e-10				0.3976	0.32113	0.18881			0.34203	0.16315	0.09792				346.856	62.8438
		36.7901	34.5679	19.2593			0.70676	0.60054	0.60017		0.77083	0.73592	0.71637			0.67212	0.59777	0.60308		0.76605	0.70904	0.72209				2.35387e-09	8.47272e-10	8.06029e-10			1.43939e-09	3.30149e-10	1.72238e-10				0.38464	0.20012	0.30438			0.31367	0.26104	0.10714				416.341	59.7681
		28.2716	24.8148	26.4198			0.7008	0.61791	0.62107		0.77418	0.76334	0.71613			0.67291	0.60561	0.59739		0.7805	0.73733	0.71187				2.7394e-09	5.71288e-10	5.10137e-10			1.27801e-09	5.51709e-10	3.81726e-10					0.35216	0.16443			0.26862	0.12587	0.09072				485.703	56.7424
			33.1671	27.7778				0.64465	0.60806			0.75316				0.67528	0.61133	0.6135		0.76707	0.73858	0.7517					8.67548e-10	6.81281e-10			9.35045e-10	3.79608e-10	2.4396e-10					0.30111	0.25392			0.30612	0.16693	0.1677				555.159	55.2626
			29.2602	23.7037				0.62947	0.60679			0.75017				0.65666	0.60541	0.59455		0.75301	0.74969	0.71534						6.81281e-10			8.63599e-10	3.17652e-10	1.14539e-10					0.31517	0.25897			0.30145	0.23865	0.17556				624.467	53.0519
			26.6002	28.5185												0.6446	0.61121	0.60321		0.77102	0.75078	0.72573						3.28687e-10			9.47768e-10	3.38167e-10	2.31379e-10						0.17909			0.26805	0.2113	0.12315				693.953	51.8698
			33.2502	28.0964												0.62683	0.62144	0.5994		0.79012	0.7362	0.70348									8.03994e-10		2.93483e-10									0.26983	0.15127	0.13686				763.373	50.9859
			36.4921	25.1039														0.61118			0.76165												2.11548e-10										0.22928	0.11777				832.83	49.8049
			36.4921	27.3483																																												902.187	48.8216
			33.9983	21.9451																																												971.583	48.2919
			29.0108	31.7539																																												1041.01	47.2514
				28.512																																												1110.46	47.2379
				26.4339																																												1179.82	46.3265
				31.0058																																												1249.2	45.4932
				30.0083																																												1318.64	45.7493
				28.9277
				29.2602
				26.9327
[truncated: 12 more columns]
