# Supplementary material for: Neutrophil-mediated oxidative stress and albumin structural damage predict COVID-19-associated mortality
Source: eLife. 2021 Nov 25;10:e69417. doi: 10.7554/eLife.69417 (PMC8641949; doi:10.7554/eLife.69417)
Supplement: Figure 6—source data 1. [file elife-69417-fig6-data1.xlsx]

## Sheet: Fig. 6
		Panels A-C and E, F																Cox Survival anlyses
		Group	DCF pos tot Neut % Total	HPO	S/W	S parameter	S parameter	TauR				Panel D						Panels G-J
						WB	WB	WB											Monitoring tel death or release	Sensorship							Risk score	Risk score
				catalase assay		16DSA	5DSA	16-DSA				group	HPO	S/W				group	days	Status	S/W	Ratio	Albumin	Alb	HPO	HPOx	S/W-HPO	S/W-HPOx
												Unsorted										>< 0.15		>< 28.82		><8.66		><0.0194
		Cont	27.86	2.2	0.26862	0.63849	0.76622	7.5192e-10				Cont	2.2	0.26862								Mean of AA		Mean of AC		Mean of AE		mean of AG
		Cont	36.79	2.8	0.25458	0.61944	0.74239	6.89341e-10				Cont	2.8	0.25458				Sev-R	30.1	0	0.17187	More	22.716	Less	8	Less	0.02148	More
		Cont	15.16	3.6	0.26814	0.63553	0.75506	5.45613e-10				Cont	3.6	0.26814				Sev-R	28.7	0	0.16315	Less	20.1235	Less	5	Less	0.03263	More
		Cont	55.89	2	0.31367	0.64825	0.77618	8.63599e-10				Cont	2	0.31367				Sev-R	31	0	0.12587	Less	20.3704	Less	7	Less	0.01798	Less
		Cont	36.74	2.8	0.30145	0.67212	0.76605	1.43939e-09				Cont	2.8	0.30145				Sev-R	29.5	0	0.16693	More	51.4815	More	4.4	Less	0.03794	More
		Cont	36.46	3.5	0.30612	0.67291	0.7805	1.27801e-09				Cont	3.5	0.30612				Sev-R	27	0	0.23865	More	31.4815	More	7.2	Less	0.03315	More
		Cont	18.21	2	0.34203	0.67528	0.76707	9.47768e-10				Cont	2	0.34203				Sev-R	32	0	0.2113	More	39.7531	More	5.4	Less	0.03913	More
		Cont	24.49	2.6	0.28136	0.65666	0.75301	9.58165e-10				Cont	2.6	0.28136				Sev-R	34	0	0.15127	Less	34.5679	More	4.6	Less	0.03289	More
		Cont	61.7	--	0.26983	0.62683	0.79012	8.03994e-10				Cont	--	0.26983				Sev-R	35	0	0.22928	More	24.8148	Less	5.6	Less	0.04094	More
		Sev-Rec	39.9	7	0.12587	0.59426	0.70904	3.30149e-10				Sev-R	8	0.17187				Sev-R	28.6	0	0.08485	Less	33.1671	More	5	Less	0.01697	Less
		Sev-Rec	42.46	8	0.17187	0.61133	0.74766	2.80797e-10				Sev-R	5	0.16315				Sev-R	29.4	0	0.1621	More	29.2602	More	5.1	Less	0.03178	More
		Sev-Dec	75.7	13	0.20306	0.61122	0.74415	4.5209e-10				Sev-R	7	0.12587				Sev-R	34	0	0.21918	More	26.6002	Less	7.5	Less	0.02922	More
		Sev-Rec	49.57	--	0.24904	0.62144	0.74596	6.04118e-10				Sev-R	4.4	0.16693				Sev-R	31.2	0	0.13836	Less	33.2502	More	7.5	Less	0.01845	Less
		Sev-Dec	74.87	6.4	0.09792	0.58391	0.70643	1.57012e-10				Sev-R	7.2	0.23865				Sev-R	32.1	0	0.16339	More	36.4921	More	10	More	0.01634	Less
		Sev-Rec	53.1	4.4	0.16693	0.60561	0.74969	3.38167e-10				Sev-R	5.4	0.2113				Sev-R	35	0	0.14359	Less	36.4921	More	10.5	More	0.01368	Less
		Sev-Rec	35.74	5	0.16315	0.59777	0.73858	3.17652e-10				Sev-R	4.6	0.15127				Sev-R	29	0	0.24277	More	33.9983	More	10	More	0.02428	More
		Sev-Dec	68.5	7.6	0.13055	0.59739	0.71187	1.72238e-10				Sev-R	5.6	0.22928				Sev-R	28	0	0.11733	Less	29.0108	More	12.5	More	0.00939	Less
		Sev-Rec	72.74	5.4	0.2113	0.60987	0.74596	3.79608e-10				Sev-R	5	0.08485				Sev-D	15	1	0.20306	More	38	More	13	More	0.01562	Less
		Sev-Dec	89.2	8	0.13402	0.59455	0.71534	2.20969e-10				Sev-R	5.1	0.1621				Sev-D	2	1	0.13402	Less	16.4198	Less	8	Less	0.01675	Less
		Sev-Dec	73.91	11.6	0.1677	0.60321	0.72573	2.4396e-10				Sev-R	7.5	0.21918				Sev-D	3	1	0.15499	More	23.8272	Less	8	Less	0.01937	Less
		Sev-Dec	68.94	10	0.13686	0.5994	0.7517	1.14539e-10				Sev-R	7.5	0.13836				Sev-D	4	1	0.13055	Less	37.5309	More	7.6	Less	0.01718	Less
		Sev-Dec	--	9.4	0.09072	0.61359	0.71613	2.31379e-10				Sev-R	10	0.16339				Sev-D	1	1	0.09792	Less	20.4938	Less	6.4	Less	0.0153	Less
		Sev-Rec	69.18	7.2	0.23865	0.62743	0.73733	5.51709e-10				Sev-R	10.5	0.14359				Sev-D	7	1	0.10714	Less	23.2099	Less	10	More	0.01071	Less
		Sev-Dec	73.91	11	0.17556	0.6135	0.72209	2.93483e-10				Sev-R	10	0.24277				Sev-D	9	1	0.09072	Less	19.2593	Less	9.4	More	0.00965	Less
		Sev-Dec	68.94	10	0.10714	0.60308	0.71014	1.99846e-10				Sev-R	12.5	0.11733				Sev-D	3	1	0.1677	More	26.4198	Less	11.6	More	0.01446	Less
		Sev-Dec	85.65	7	0.12315	0.60071	--	2.67449e-10				Sev-D	13	0.20306				Sev-D	10	1	0.17556	Less	27.7778	Less	11	More	0.01596	Less
		Sev-Dec	76.79	8	0.15499	0.6125	0.70963	3.81726e-10				Sev-D	8	0.13402				Sev-D	7	1	0.12315	Less	23.7037	Less	7	Less	0.01759	Less
		Sev-Rec	76.65	4.6	0.15127	0.60541	0.75316	--				Sev-D	8	0.15499				Sev-D	5	1	0.13686	Less	28.5185	More	10	More	0.01369	Less
		Sev-Rec	84.74	5.6	0.22928	0.61121	0.75017	--				Sev-D	7.6	0.13055				Sev-D	1	1	0.11777	Less	28.0964	Less	11	More	0.01071	Less
		Sev-Dec		11				2.11548e-10				Sev-D	6.4	0.09792				Sev-D	4	1	0.14933	Less	25.1039	Less	11	More	0.01358	Less
												Sev-D	10	0.10714				Sev-D	4	1	0.1475	Less	27.3483	Less	10	More	0.01475	Less
												Sev-D	9.4	0.09072				Sev-D	0	1	0.10347	Less	21.9451	Less	8.5	Less	0.01217	Less
												Sev-D	11.6	0.1677				Sev-D	5	1	0.2446	More	31.7539	More	8.5	Less	0.02878	More
												Sev-D	11	0.17556				Sev-D	0	1	--	--	28.512	Less	15.5	More	--	--
												Sev-D	7	0.12315				Sev-D	0	1	0.07146	Less	26.4339	Less	9	More	0.00794	Less
												Sev-D	10	0.13686				Sev-D	8	1	0.13916	Less	31.0058	More	8	Less	0.0174	Less
												Sev-D	11	0.11777				Sev-D	5	1	0.13667	Less	30.0083	More	10	More	0.01367	Less
												Sev-D	11	0.14933				Sev-D	17	1	0.13473	Less	28.9277	More	10	More	0.01347	Less
												Sev-D	10	0.1475				Sev-D	11	1	0.13498	Less	29.2602	More	10	More	0.0135	Less
												Sev-D	8.5	0.10347				Sev-D	13	1	0.08077	Less	26.9327	Less	9	More	0.00897	Less
												Sev-D	8.5	0.2446
												Sev-D	15.5	--
												Sev-D	9	0.07146
												Sev-D	8	0.13916
												Sev-D	10	0.13667
												Sev-D	10	0.13473
												Sev-D	10	0.13498
												Sev-D	9	0.08077
