# Supplementary material for: Neutrophil-mediated oxidative stress and albumin structural damage predict COVID-19-associated mortality
Source: eLife journal article supplement (doi:10.7554/elife.69417), 2021-11-25
Supplement: supp [file elife_poa_e69417_Figure_5_source_data_1.xlsx]

## Sheet: Fig 5
				delta S										delta W									W signal						S signal
		Panel A										Panel B										Panel D						Panel E
		Time	Control	SE of mean	Sev-R	SE of mean	Sev-D	SE of mean				Time	Control	SE of mean	Sev-R	SE of mean	Sev-D	SE of mean				Ethanol-uL	Mean	SEM				Ethanol-uL	Mean	SEM
		1	100	2.14288e-06	100	9.33008e-07	100	6.45548e-06				1	100	3.68396e-06	100	1.90903e-06	100	3.76912e-07				Cont-0	683.54	11.34				Cont-0	292.975	18.045
		2	177.52	28.3522	123.74	6.03756	99.4533	6.51632				2	219.117	61.3788	125.792	1.00414	130.512	1.68395				Cont-2	684.971	84.0323				Cont-2	235.513	25.7868
		3	198.819	31.4385	133.37	7.96268	118.079	4.43152				3	253.376	63.0338	136.433	2.2396	153.406	6.76146				Cont-4	901.72	71.7696				Cont-4	247.23	15.1602
		4	215.65	38.0719	136.07	2.11246	116.962	3.27682				4	272.112	66.5298	139.347	1.28846	166.391	11.7732				Cont-8	1407.25	224.915				Cont-8	237.426	28.1459
		5	220.366	37.5547	135.033	6.2746	127.752	5.63171				5	285.421	63.7229	140.996	5.38971	176.526	17.7101				Cont-16	11065.1	1881.71				Cont-16	119.042	19.9462
		6	223.162	36.5095	136.361	5.91858	129.329	6.77309				6	287.055	66.3402	144.063	5.25967	183.808	22.9876				Sev-R-0	1112.11	220.035				Sev-R-0	258.487	27.0561
		7	230.656	42.4789	137.735	6.85272	129.587	5.44535				7	295.847	69.9756	146.075	5.88233	188.393	24.9131				Sev-R-2	1272.4	41.1877				Sev-R-2	205.98	22.4974
			--	--	--	--	--	--														Sev-R-4	1573.2	104.226				Sev-R-4	187.757	24.6421
			--	--	--	--	--	--														Sev-R-8	2923.49	301.732				Sev-R-8	176.549	23.7469
			--	--	--	--	--	--														Sev-R-16	14329.7	1217.31				Sev-R-16	68.3979	15.1336
			--	--	--	--	--	--														Sev-D-0	1114.27	296.73				Sev-D-0	215.85	29.0334
			--	--	--	--	--	--														Sev-D-2	1344.69	213.936				Sev-D-2	178.663	21.1392
					--	--	--	--														Sev-D-4	1724.46	332.288				Sev-D-4	152.798	22.7359
					--	--	--	--														Sev-D-8	4385.55	668.118				Sev-D-8	166.135	29.3185
					--	--	--	--														Sev-D-16	15768.6	1578.56				Sev-D-16	51.0177	12.0074
					--	--	--	--
